# Supplementary material
Source: Springer Nature journal article supplement (https://www.springermedizin.de/resource/supplementary/12889_2014_6810_MOESM3_ESM.pdf/9499082)
Supplement: MOESM3 [file 9499082]

**SNEM**

Dependent from government and not integrated with other sectors

No pesticides laws but strong social participation

**Advocacy, social mobilization, legislation**

**Collaborations among sectors**

Pesticides are regulated, strong social commitments

Based on larval control with limited adult control. Closely integrated with community

**Integrated approach**

Independent but also collaborates with department of agriculture, consumer services, and public health sectors

Epidemiological surveillance  
Disease monitoring through specialists and it is community based

**Evidence based decision making**

Larval and adult control used with bio-chemical agents. Integrated with authorities

Large group of community workers  
Lack of technology and continuing education

**Capacity building**

Small group of workers  
Strong continuing education and technologies

Entomological, virus, and environmental surveillance. Monitoring through specialists and technologies

**AMCD**
